# Supplementary material for: Circular RNA hsa_circ_000984 promotes colon cancer growth and metastasis by sponging miR-106b
Source: PubMed Central journal article supplement (PMC5710956; doi:10.18632/oncotarget.21748), 2017-10-10
Supplement: oncotarget-08-91674-s001.pdf [file oncotarget-08-91674-s001.pdf]

# Circular RNA hsa\_circ\_000984 promotes colon cancer growth and metastasis by sponging miR-106b

## SUPPLEMENTARY MATERIALS

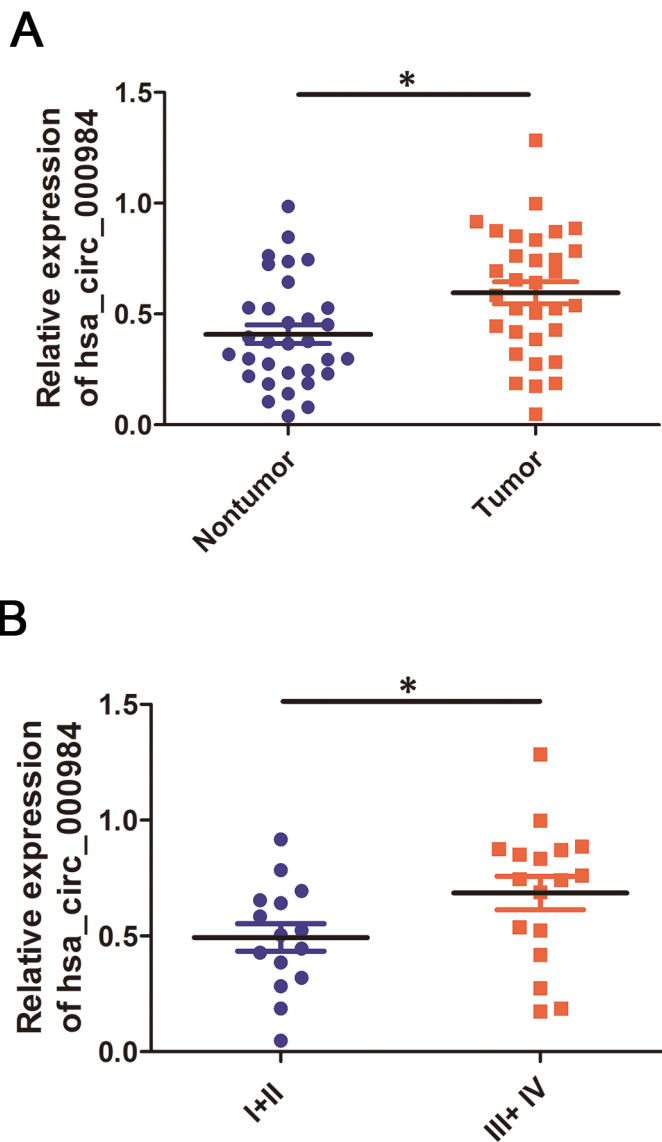

**Supplementary Figure 1:** (A) The expression level of hsa\_circ\_000984 in clinical colorectal cancerous tissues was significantly up-regulated compared with corresponding adjacent normal tissues analyzed by qRT-PCR. (B) The expression level of hsa\_circ\_000984 in colorectal cancerous tissues was significantly higher in patients with a higher pathological stage (III+IV). \* $P < 0.05$ .

Supplementary Table 1: Relationships between hsa\_circ\_000984 expression and the clinical clinicopathological characteristics of colorectal cancer patients.

| Parameters                | Total (76) | Expression of hsa_circ_000984 |       |    | <i>P</i> <sub>value</sub> * |               |
|---------------------------|------------|-------------------------------|-------|----|-----------------------------|---------------|
|                           |            | High                          | Low   |    |                             |               |
| <b>Gender</b>             |            |                               |       |    |                             |               |
| Male                      | 48         | 25                            | 32.89 | 23 | 30.26                       | 0.634         |
| Female                    | 28         | 13                            | 17.11 | 15 | 19.74                       |               |
| <b>Age</b>                |            |                               |       |    |                             |               |
| ≤60                       | 43         | 23                            | 30.26 | 20 | 26.32                       | 0.487         |
| >60                       | 33         | 15                            | 19.74 | 18 | 23.68                       |               |
| <b>Histological grade</b> |            |                               |       |    |                             |               |
| Well/moderate             | 32         | 14                            | 18.42 | 18 | 23.68                       | 0.352         |
| Other                     | 44         | 24                            | 31.58 | 20 | 26.32                       |               |
| <b>Tumor size</b>         |            |                               |       |    |                             |               |
| ≤2cm                      | 39         | 21                            | 27.63 | 25 | 32.89                       | 0.336         |
| >2cm                      | 37         | 17                            | 22.37 | 13 | 17.11                       |               |
| <b>TNM stages</b>         |            |                               |       |    |                             |               |
| I+II                      | 37         | 14                            | 18.42 | 23 | 30.26                       | <b>0.035*</b> |
| III+IV                    | 39         | 24                            | 31.58 | 15 | 19.74                       |               |

\*Chi-square test.

\**P*<0.05
